# Supplementary material for: Genomic structure and diversity of Plasmodium falciparum in Southeast Asia reveal recent parasite migration patterns
Source: PubMed Central journal article supplement (PMC6572796; doi:10.1038/s41467-019-10121-3), 2019-06-17
Supplement: 41467_2019_10121_MOESM1_ESM.pdf [file 41467_2019_10121_MOESM1_ESM.pdf]

## Supplementary Information

Genomic structure and diversity of *Plasmodium falciparum* in Southeast Asia reveal recent parasite migration patterns

Shetty *et al.*

## Supplementary Methods

After excluding ~636 samples considered to be genetically similar specifically for admixture analysis, SNPs were pruned based on linkage disequilibrium using the PLINK genomic analysis toolkit (version 1.9)<sup>1,2</sup>. SNPs were assessed in a window size of 50 SNPs with a step size of 10 SNPs and a pairwise  $r^2$  threshold of 0.1. The final set of ~10,000 SNPs was used as input for the ADMIXTURE software (version 1.3)<sup>3,4</sup> to determine ancestral population proportions in each sample. Admixture estimates were computed using the parameters specified for haploid chromosomes over a varying number of clusters (K) ranging from 1 to 40 with 10 technical replicates each. A best value for K was assessed by maximizing the log-likelihood across replicates for a single K value and minimizing the cross-validation (CV) error between different K values. The cluster proportions for each sample determined by the best value of K were plotted using R statistical programming after grouping them by their geographical locations. The samples were also stratified into non-admixed and admixed groups using an admixture proportion cut-off of 70% belonging to a single ancestral population. The samples were assigned the geographic location as inferred from the collection site of the sample.

We further analyzed the data to infer preliminary population structure using Principal Components Analysis (PCA) as implemented by the KING software (version 1.4)<sup>5</sup>. Additional outliers (three isolates each from Cambodia and Myanmar) based on their clustering with isolates from Africa were identified and excluded from downstream analyses. Analysis was repeated for a subset of samples originating from districts in Cambodia and neighboring provinces in Laos, Thailand, and Vietnam. The first and second principal components were plotted using the R statistical program illustrating geographical regions in distinct colors.

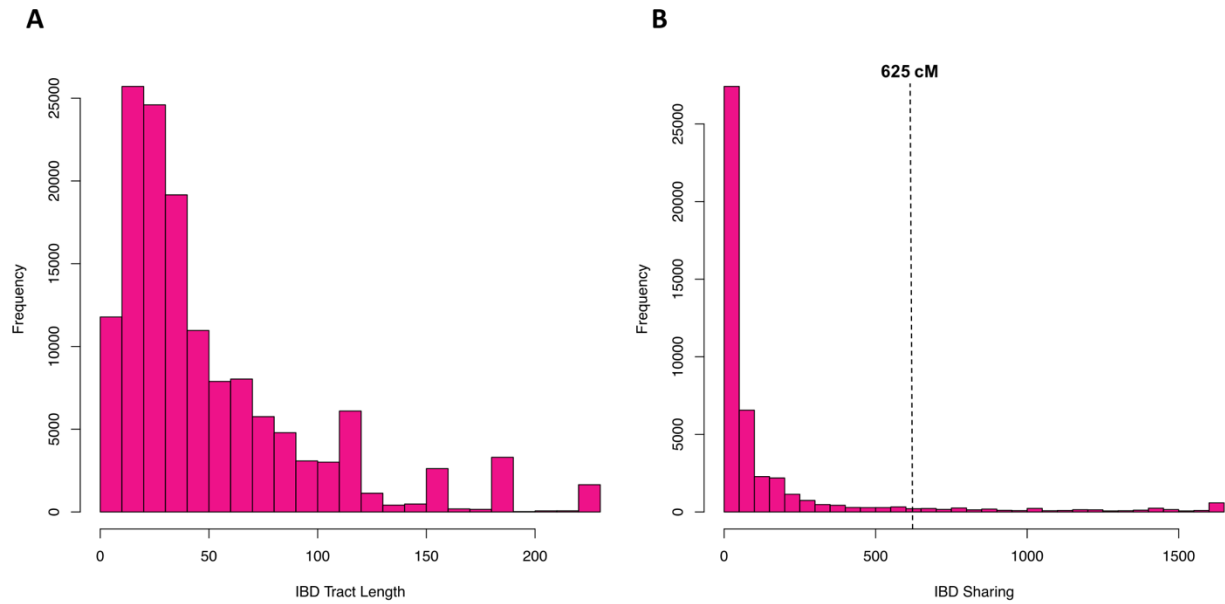

**Supplementary Figure 1. Distribution of IBD tract lengths estimated using BEAGLE.** (A) Histogram of individual IBD tract lengths, (B) Histogram of total IBD sharing after aggregating the IBD tracts for each sample pair based on 32,675 (2.2%) isolate pairs that showed non-zero IBD sharing including 2,850 isolate pairs with IBD sharing > 625cM.

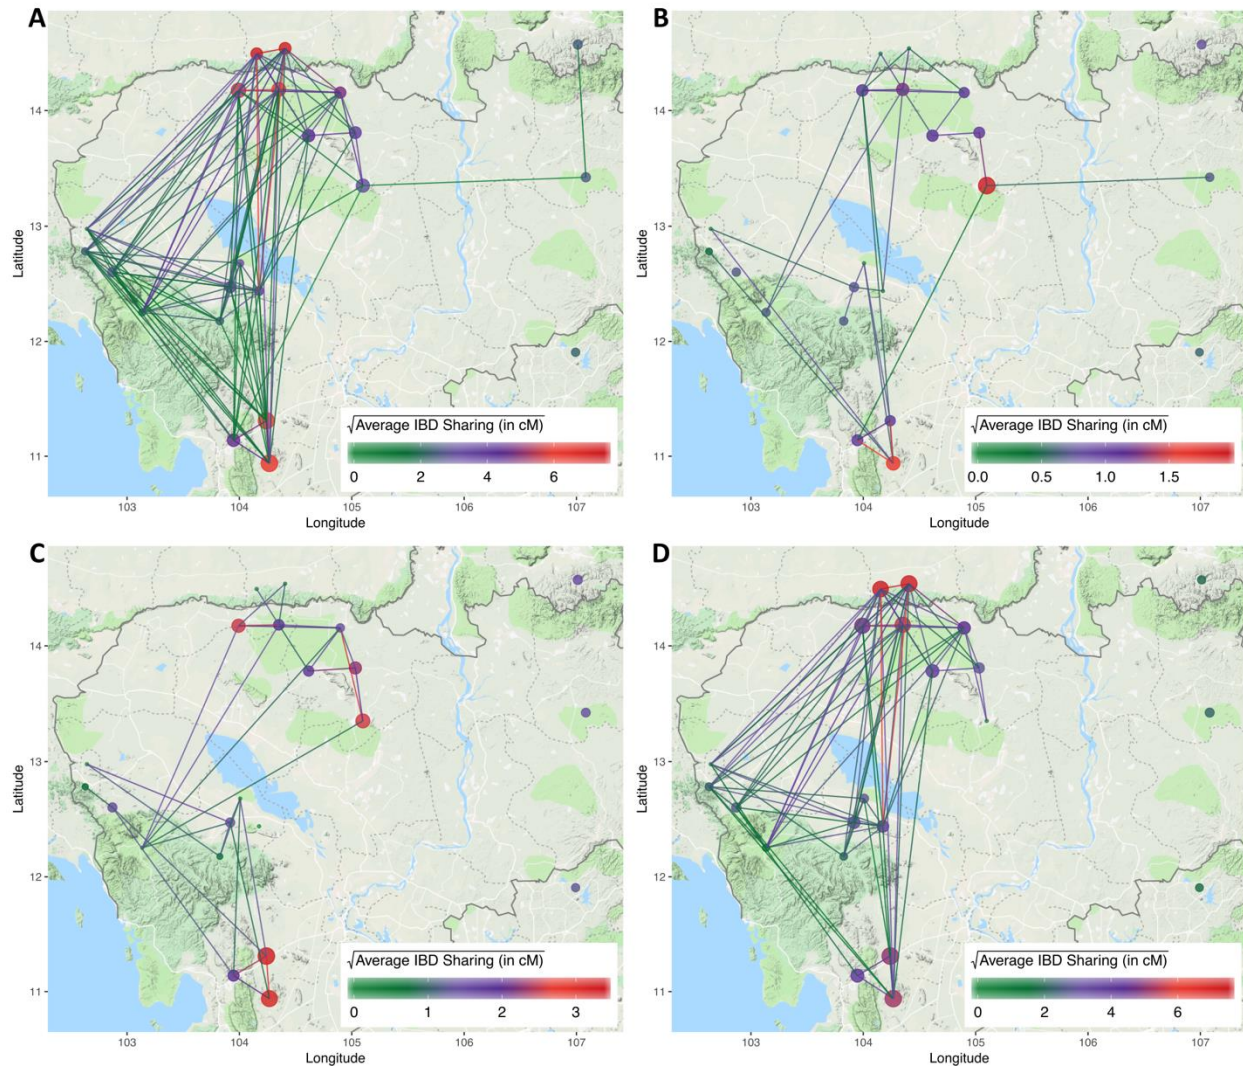

**Supplementary Figure 2. Regional relatedness within and between Cambodian districts.** (A) All segments greater than 2cM, (B) 2cM – 15cM, (C) 15cM – 30cM, and (D) greater than 30cM. Sharing of larger IBD segments indicates migration that is more recent. Circles represent the average IBD sharing within a district while lines represent the average IBD sharing between two districts. The color indicates the magnitude of IBD sharing while the area of the circle represents the average number of segments shared. Only district-pairs with >3% isolate-pairs demonstrating IBD sharing are included. Map data: Google, 2018.

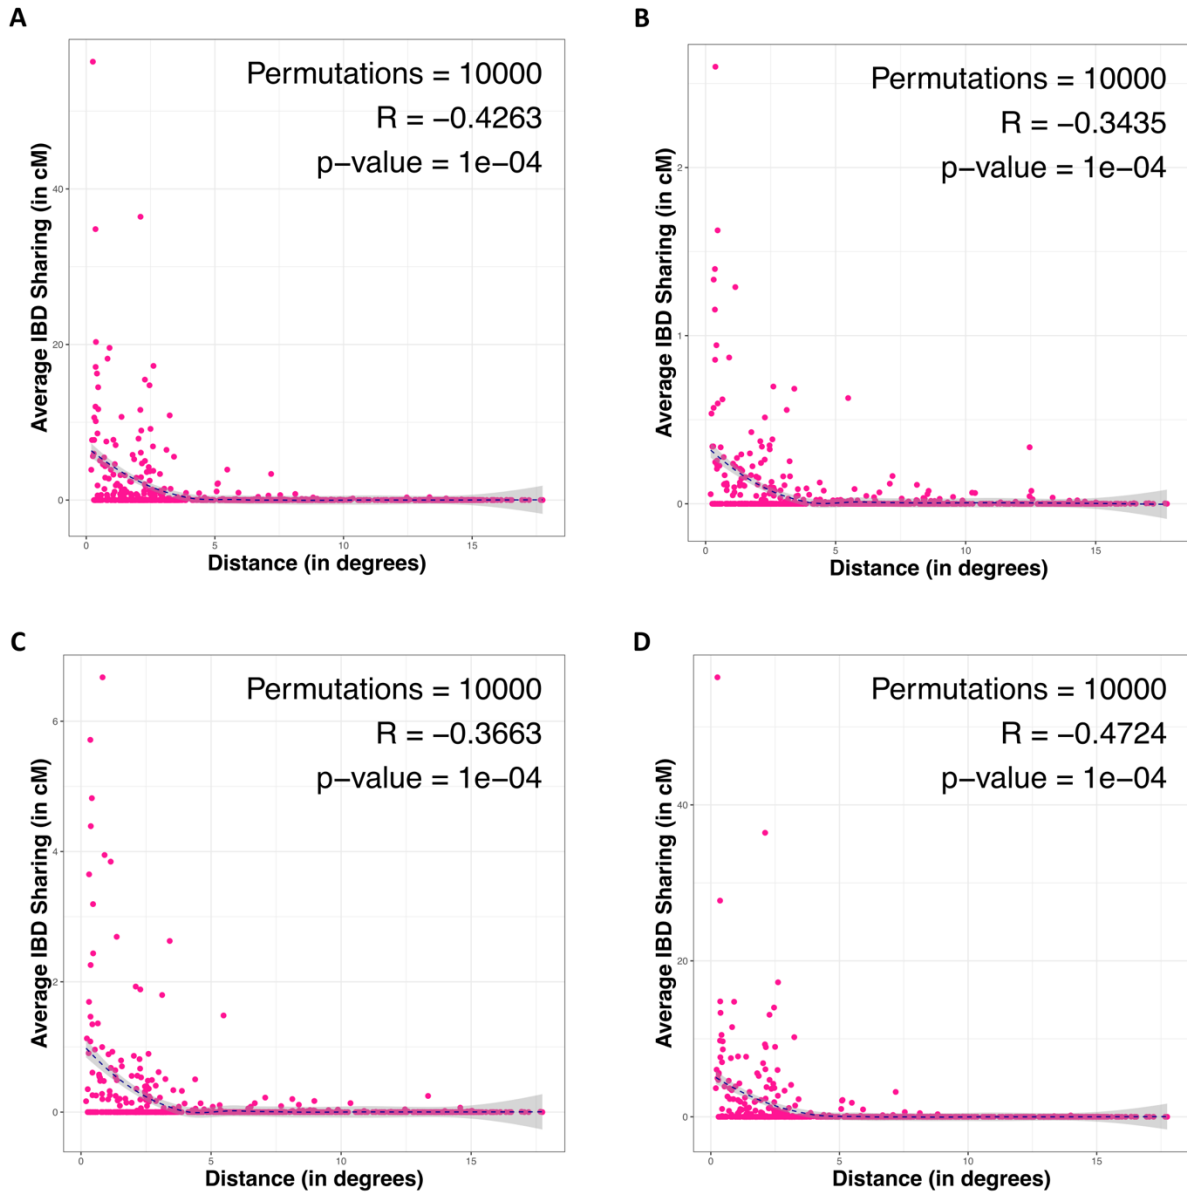

**Supplementary Figure 3. Isolation-by-distance.** Decay of average IBD (shown in logarithmic scale) as a function of distance stratified by IBD segment length; greater than 2cM (A), 2cM – 15cM (B), 15cM – 30cM (C) and greater than 30cM (D). R indicates Spearman correlation values.

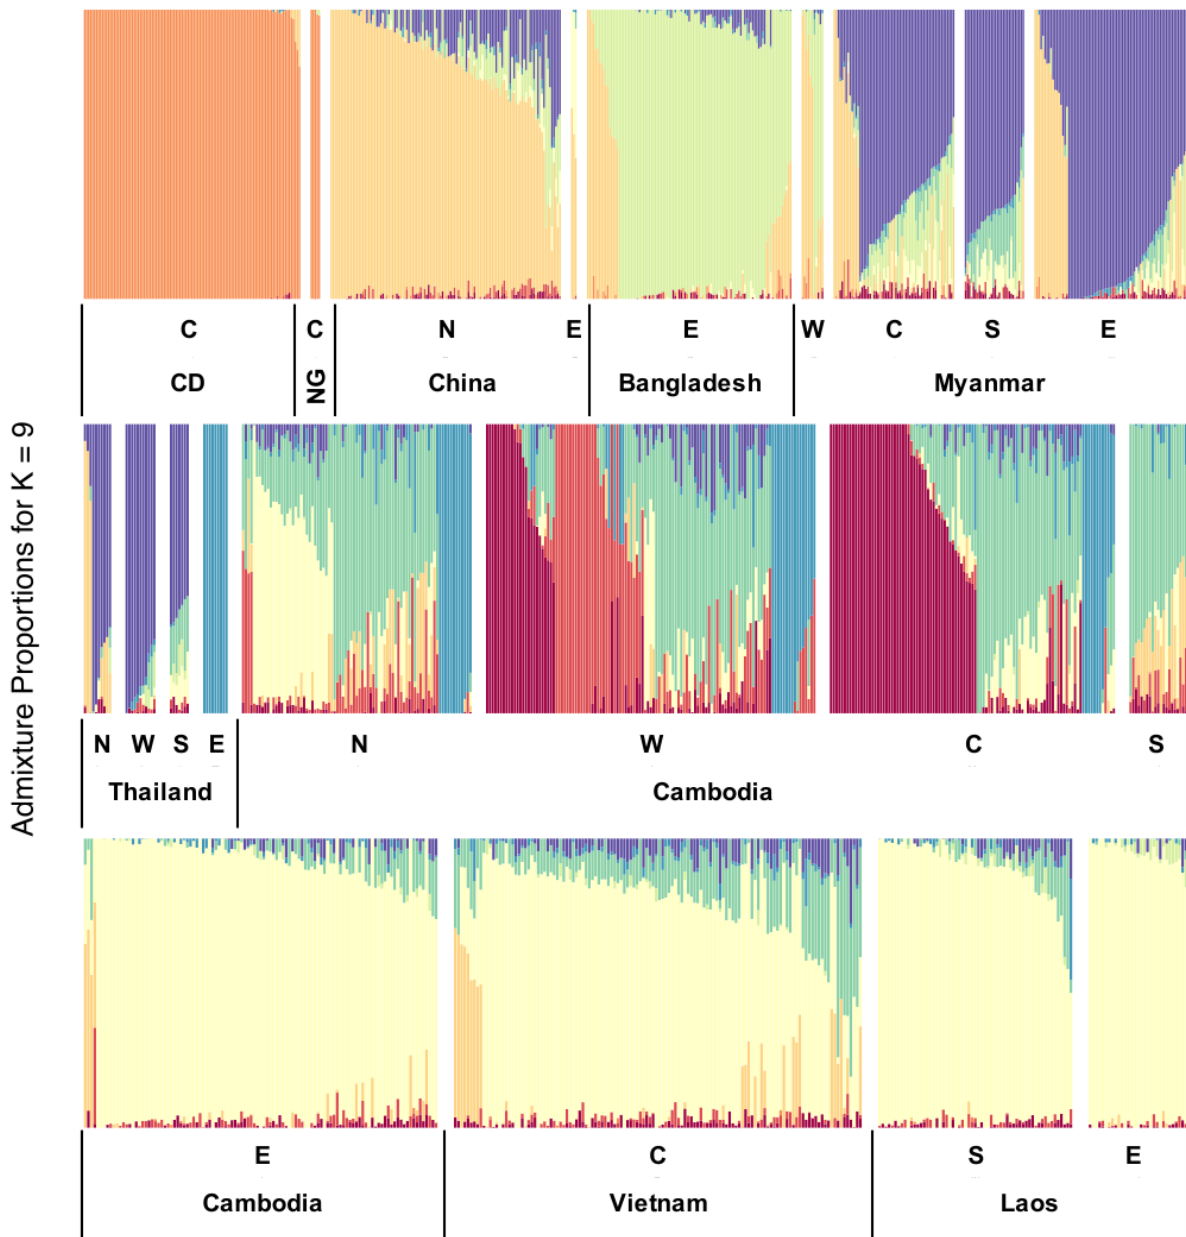

**Supplementary Figure 4. Admixture analysis.** ADMIXTURE was used to illustrate the proportion of ancestral populations (K) for each sample. For K=9, each vertical line represents a single sample, with color denoting the ancestral proportion in that sample. N, W, C, S, and E denote northern, western, central, southern, and eastern provinces within a country. Democratic Republic of Congo and Nigeria are abbreviated as CD and NG, respectively. We found nine ancestral clusters, with one cluster comprised of samples from Africa. One cluster was found predominantly in isolates from Eastern Cambodia, Vietnam, and Laos. Isolates from China and Bangladesh showed low levels of admixture representing two distinct clusters, while isolates from Myanmar and Thailand represented a third distinct cluster. Within several Cambodian populations (except the eastern districts), we observed both non-admixed and highly admixed isolates representing the remaining four ancestral clusters.

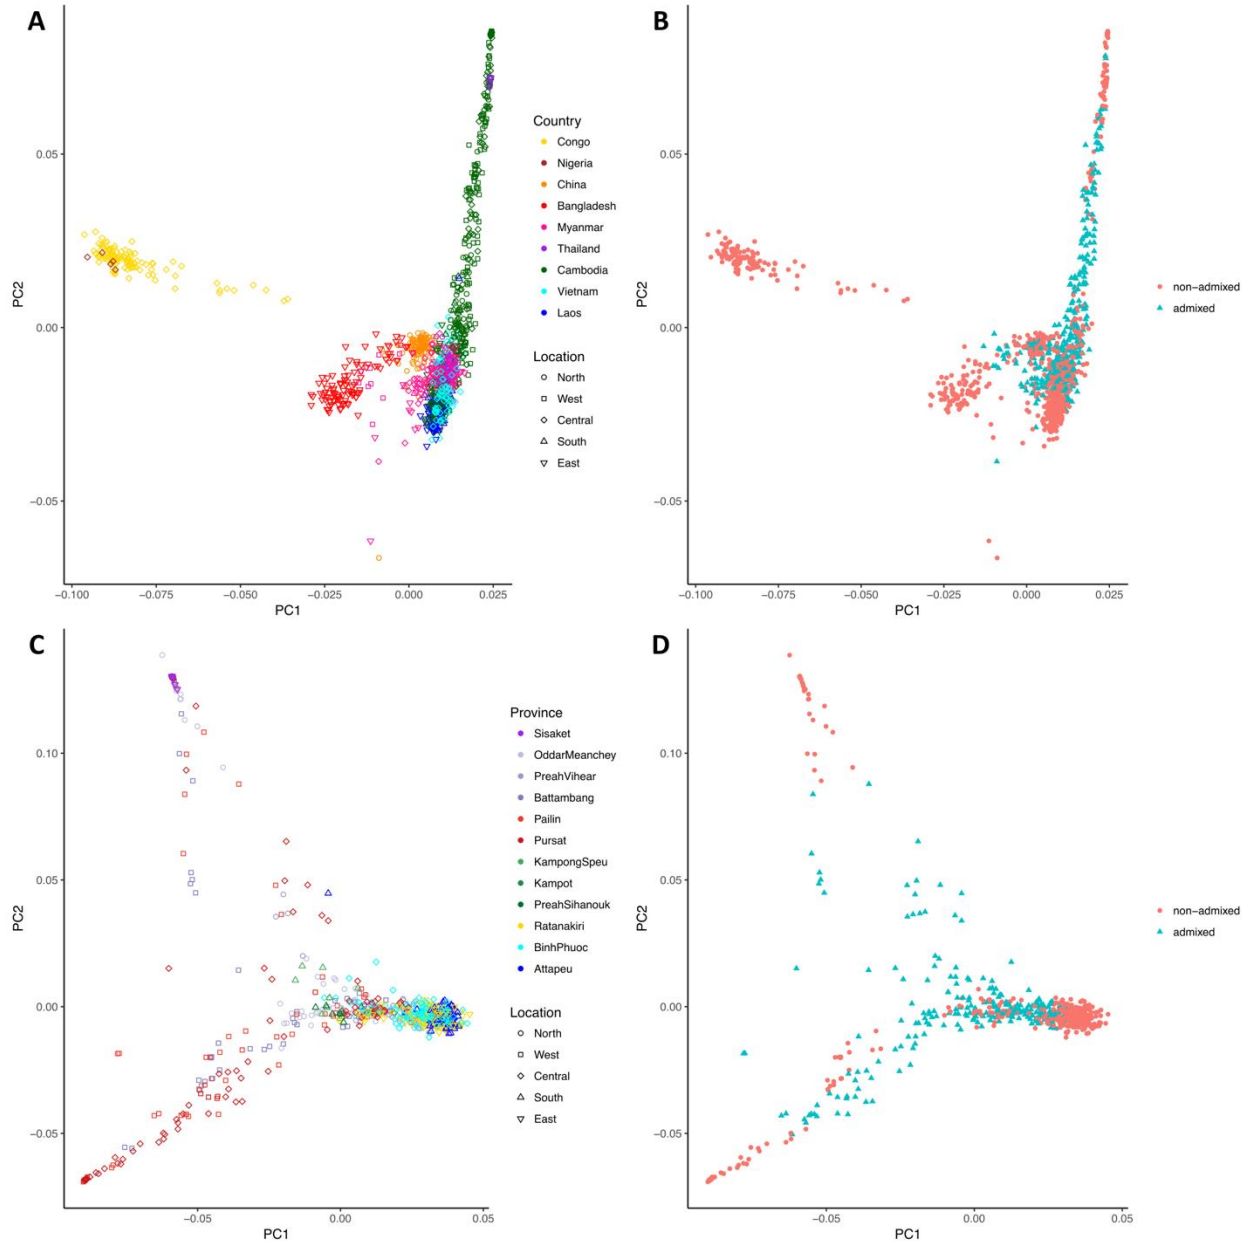

**Supplementary Figure 5. Principal Component Analysis (PCA).** PCA illustrates the first PC on the horizontal axis and the second PC on the vertical axis. The samples are colored by geographical location stratified by (A) country for all of Southeast Asia or (C) province within and around Cambodia with additional stratification by geographical position. Panels (B) and (D) illustrate the admixture status assigned to each sample in panels (A) and (C), respectively. PCA results corroborated admixture results with clear distinctions between African and Non-African populations. Isolates from China and Bangladesh clustered together while isolates from Thailand, Vietnam, and Laos illustrated less genetic diversity. Isolates from Cambodia spread along the 2nd PC show increased genetic diversity. Admixed samples are spread across the north-south cline observed along PC2.

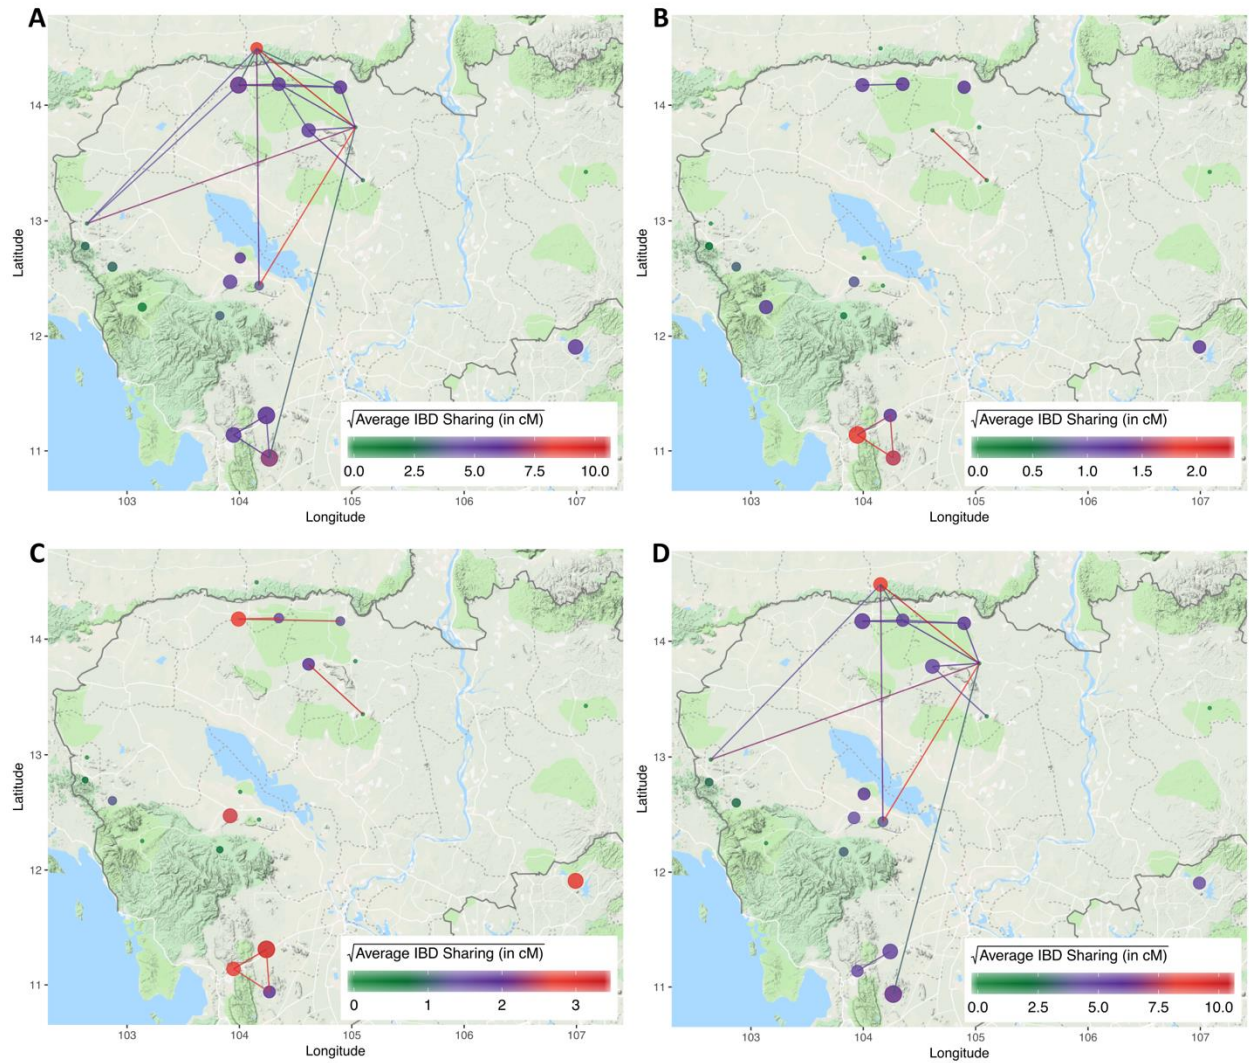

**Supplementary Figure 6. Regional relatedness of K13 mutant parasites within and between districts.** (A) All segments greater than 2cM, (B) 2cM – 15cM, (C) 15cM – 30cM, and (D) greater than 30cM. Sharing of larger IBD segments indicates migration that is more recent. Circles represent the average IBD sharing within a district while lines represent the average IBD sharing between two districts. The color indicates the magnitude of IBD sharing while the area of the circle represents the average number of segments shared. Only district-pairs with >15% isolate-pairs demonstrating IBD sharing are included. Map data: Google, 2018.



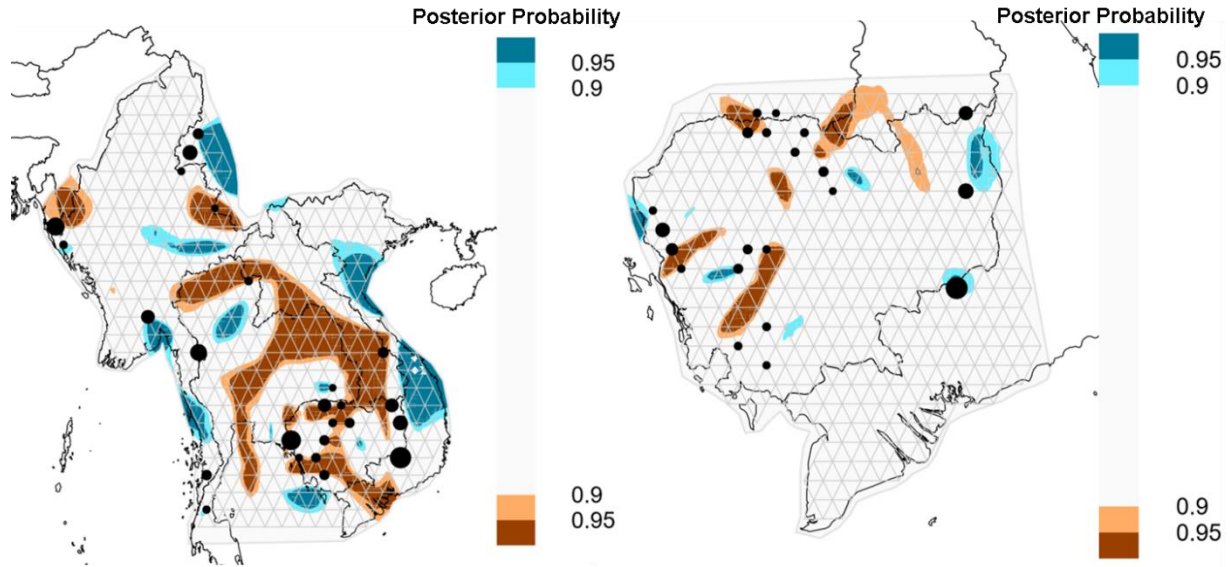

**Supplementary Figure 7. Posterior probabilities of EEMS migration parameter estimates.** EEMS posterior probability contours for Southeast Asia (left) and Cambodia (right). Each circle is a deme consisting of one or more districts. The area of the circle is proportional to the number of isolates included in the deme. Brown contours represent areas of low relative migration supported by posterior probabilities  $>0.90$ . Blue contours represent areas of high relative migration supported by posterior probabilities  $>0.90$ . Areas in gray are supported by posterior probabilities  $<0.90$ .

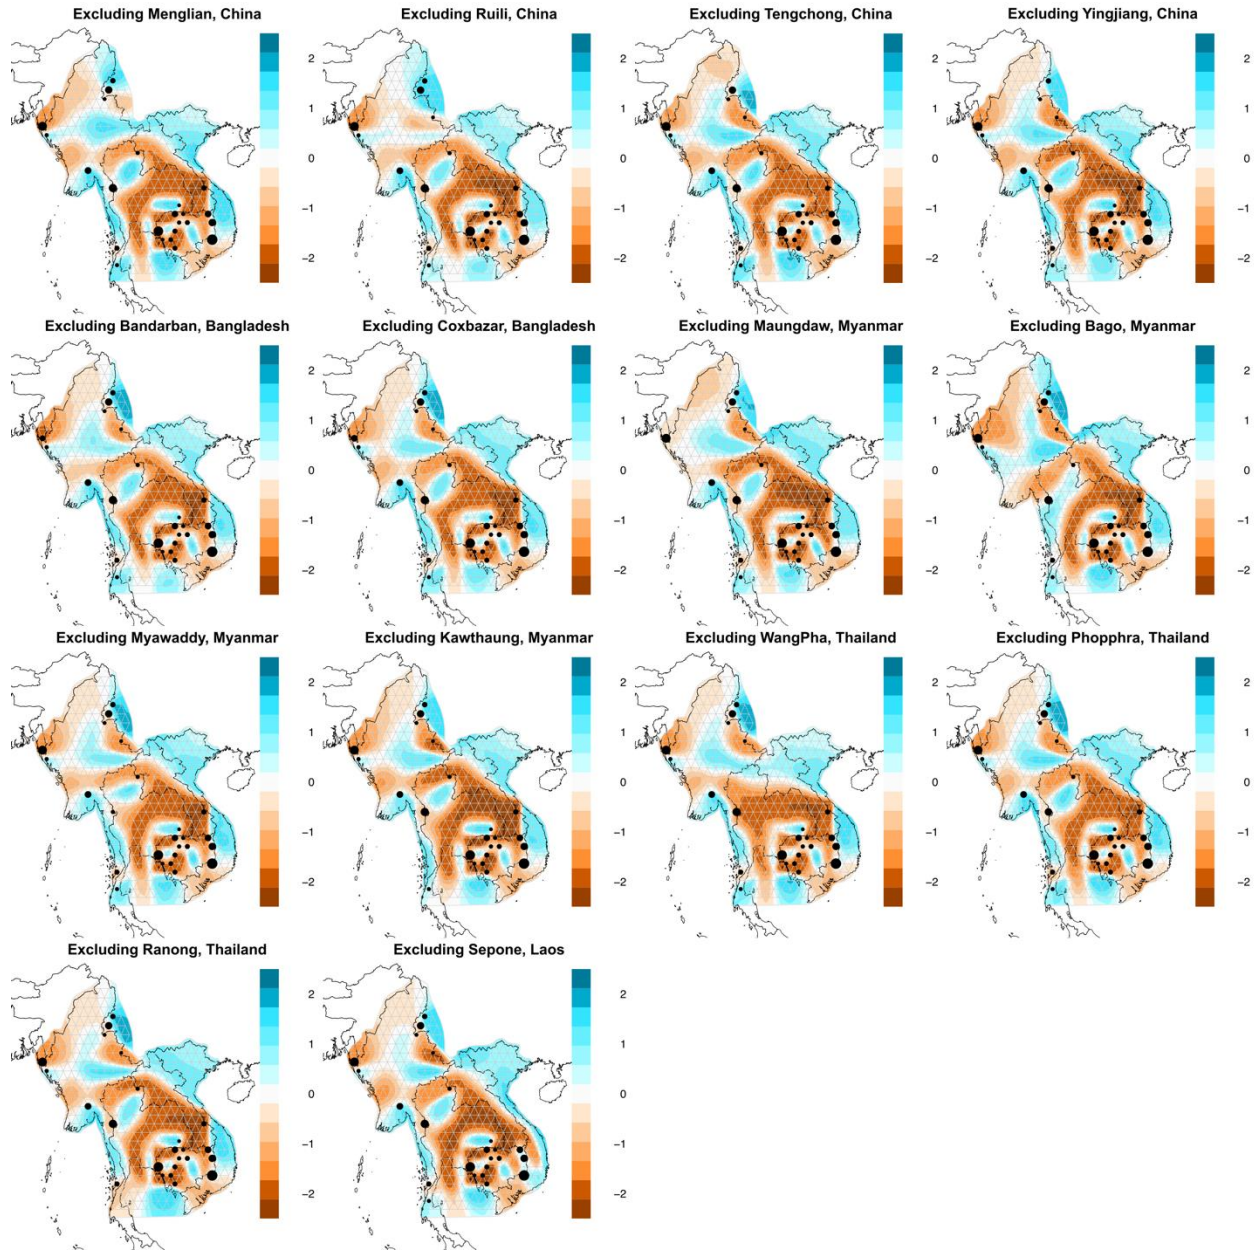

**Supplementary Figure 8. EEMS sensitivity analysis in Southeast Asia.** EEMS migration surface contours illustrating barriers to migration after iteratively excluding samples from a single district in Southeast Asia. Each circle is a deme consisting of one or more districts. The area of the circle is proportional to the number of isolates included in the deme. Brown contours indicate lower relative migration and blue contours indicate higher relative migration.

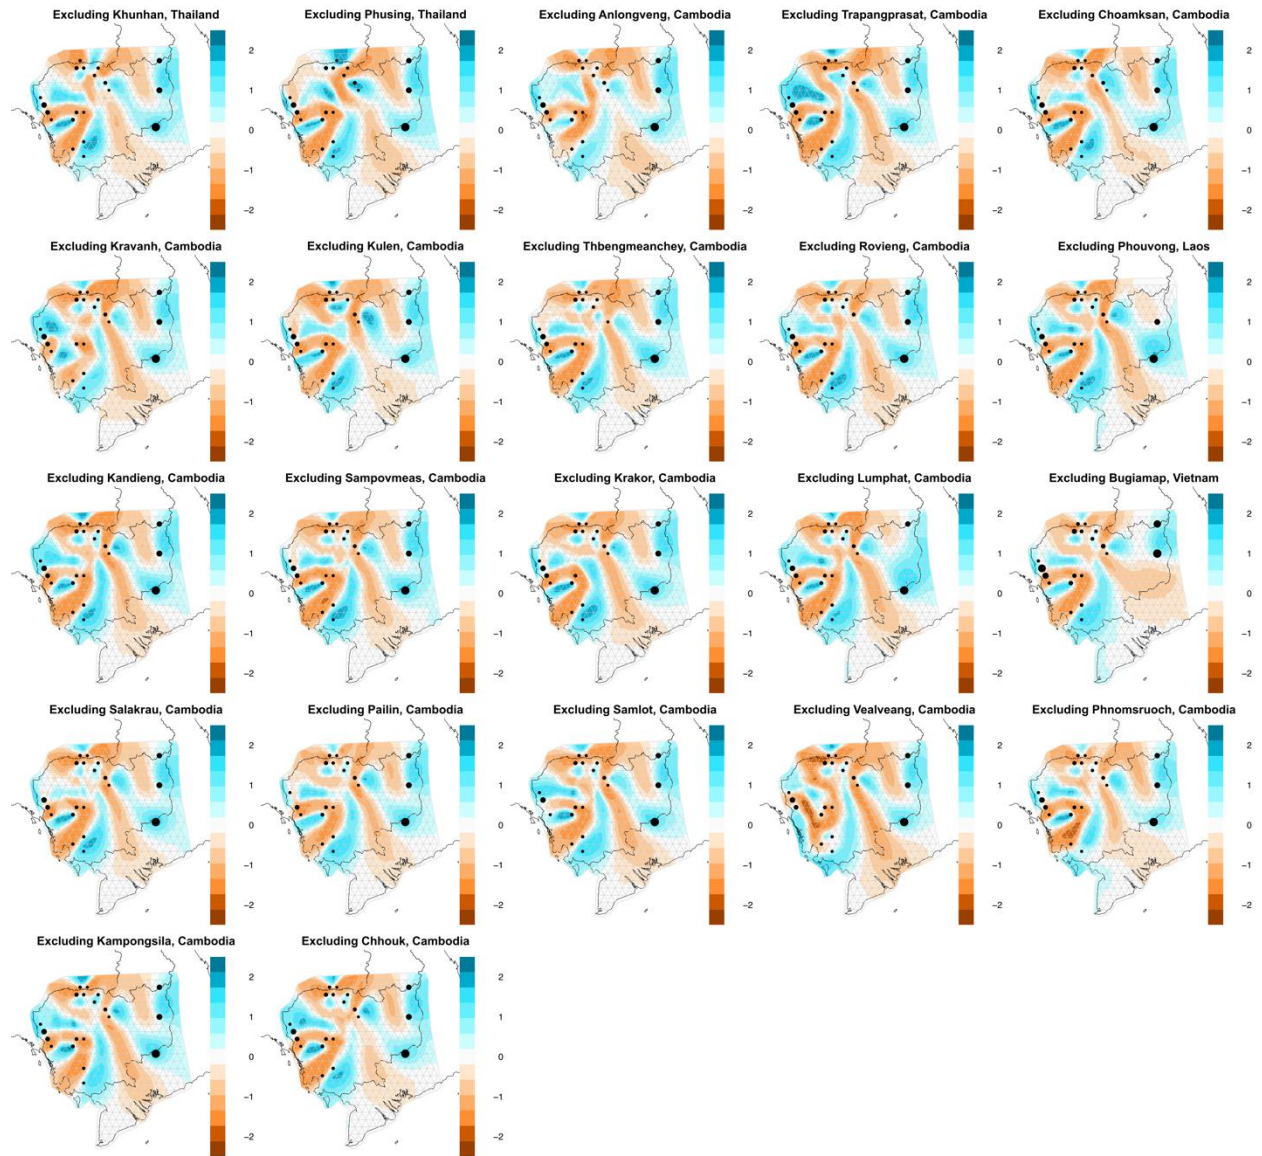

**Supplementary Figure 9. EEMS sensitivity analysis in Cambodia.** EEMS migration surface contours illustrating barriers to migration after iteratively excluding samples from a single district in Cambodia. Each circle is a deme consisting of 1 or more districts. The area of the circle is proportional to the number of isolates included in the deme. Brown contours indicate lower relative migration and blue contours indicate higher relative migration.

**Supplementary Table 1. Location and average IBD sharing within districts.**

| Country     | Province      | District        | Longitude | Latitude | Isolates | Average IBD Sharing (in cM) | # Isolates after excluding genetically similar isolates | Average IBD Sharing (in cM) after excluding genetically similar isolates |
|-------------|---------------|-----------------|-----------|----------|----------|-----------------------------|---------------------------------------------------------|--------------------------------------------------------------------------|
| Bangladesh  | Chittagong    | Bandarban       | 92.37     | 21.81    | 61       | 1.8113                      | 60                                                      | 1.1750                                                                   |
|             |               | Coxs Bazar      | 92.07     | 21.49    | 46       | 3.4213                      | 44                                                      | 2.3509                                                                   |
| Cambodia    | Battambang    | Kamrieng        | 102.57    | 13.12    | 2        | NA                          | NA                                                      | NA                                                                       |
|             |               | Samlout         | 102.87    | 12.60    | 97       | 48.4310                     | 45                                                      | 9.6813                                                                   |
|             | KampongSpeu   | Oral            | 104.06    | 11.74    | 3        | 84.7998                     | NA                                                      | NA                                                                       |
|             |               | Phnom Sruoch    | 104.24    | 11.31    | 18       | 47.3672                     | 12                                                      | 38.4303                                                                  |
|             |               | Samrong Tong    | 104.50    | 11.47    | 1        | NA                          | NA                                                      | NA                                                                       |
|             | Kampot        | Chhouk          | 104.27    | 10.94    | 15       | 67.4438                     | 6                                                       | 40.3167                                                                  |
|             | KohKong       | Thma Baing      | 103.50    | 11.75    | 1        | NA                          | NA                                                      | NA                                                                       |
|             |               | Anlong Veng     | 103.99    | 14.17    | 48       | 59.9698                     | 31                                                      | 30.3557                                                                  |
|             |               | Samrong         | 103.61    | 14.25    | 1        | NA                          | NA                                                      | NA                                                                       |
|             | OddarMeanchey | Trapang Prasath | 104.35    | 14.18    | 25       | 76.2241                     | 14                                                      | 34.6138                                                                  |
|             |               | Pailin          | 102.63    | 12.78    | 138      | 46.6317                     | 65                                                      | 5.7528                                                                   |
|             |               | Sala Krau       | 102.64    | 12.98    | 14       | 80.9460                     | 7                                                       | NA                                                                       |
|             | PreahSihanouk | Kampong Sila    | 103.95    | 11.14    | 11       | 39.9566                     | 10                                                      | 21.3176                                                                  |
|             | PreahVihear   | Cheb            | 105.46    | 13.91    | 1        | NA                          | NA                                                      | NA                                                                       |
|             |               | Chey Sen        | 105.35    | 13.58    | 2        | NA                          | NA                                                      | NA                                                                       |
|             |               | Choam Ksan      | 104.90    | 14.15    | 28       | 148.2836                    | 12                                                      | 23.4221                                                                  |
|             |               | Kulen           | 104.62    | 13.78    | 26       | 69.4446                     | 14                                                      | 20.0781                                                                  |
|             |               | Roveing         | 105.10    | 13.35    | 6        | 128.5396                    | 3                                                       | 10.4097                                                                  |
|             |               | Sankumthmey     | 104.78    | 13.49    | 1        | NA                          | NA                                                      | NA                                                                       |
|             |               | Thbeng Meanchey | 105.03    | 13.81    | 79       | 102.7461                    | 25                                                      | 14.2678                                                                  |
|             | Pursat        | Bakan           | 103.75    | 12.68    | 2        | NA                          | NA                                                      | NA                                                                       |
|             |               | Kandieng        | 104.01    | 12.68    | 9        | 11.6793                     | 5                                                       | 9.4421                                                                   |
|             |               | Krakor          | 104.18    | 12.44    | 14       | 17.8843                     | 8                                                       | 16.0148                                                                  |
| Kravanh     |               | 103.49          | 12.18     | 36       | 21.3958  | 23                          | 5.1955                                                  |                                                                          |
| Sampov Meas |               | 103.92          | 12.47     | 36       | 44.7104  | 16                          | 16.1999                                                 |                                                                          |
| Veal Veng   |               | 103.14          | 12.25     | 11       | 39.2087  | 7                           | 2.5424                                                  |                                                                          |
| Ratanakiri  | Lumphat       | 107.08          | 13.42     | 102      | 20.5412  | 73                          | 7.4625                                                  |                                                                          |

Supplementary Table 1, Continued...

| Country  | Province    | District    | Longitude | Latitude | Isolates | Average IBD Sharing (in cM) | # Isolates after excluding genetically similar isolates | Average IBD Sharing (in cM) after excluding genetically similar isolates |
|----------|-------------|-------------|-----------|----------|----------|-----------------------------|---------------------------------------------------------|--------------------------------------------------------------------------|
| China    | Yunnan      | Menglian    | 99.47     | 22.29    | 4        | 31.4918                     | 4                                                       | 31.4918                                                                  |
|          |             | Ruili       | 97.81     | 24.04    | 7        | 9.9731                      | 7                                                       | 9.9731                                                                   |
|          |             | Tengchong   | 98.51     | 25.26    | 45       | 15.8495                     | 34                                                      | 0.9406                                                                   |
|          |             | Yingjiang   | 97.93     | 24.85    | 91       | 15.9801                     | 74                                                      | 3.9126                                                                   |
| Laos     | Attapeu     | Phouvong    | 107.01    | 14.57    | 88       | 28.2729                     | 61                                                      | 6.4049                                                                   |
|          |             | Saysetha    | 102.71    | 17.98    | 1        | NA                          | NA                                                      | NA                                                                       |
|          | Savannakhet | Sepone      | 106.34    | 16.76    | 40       | 17.2380                     | 36                                                      | 9.9934                                                                   |
| Myanmar  | Bago        | Bago        | 96.59     | 17.73    | 87       | 23.3927                     | 62                                                      | 8.1529                                                                   |
|          | Kayin       | Myawaddy    | 98.53     | 16.54    | 122      | 40.4470                     | 77                                                      | 16.7014                                                                  |
|          | Rakhine     | Maungdaw    | 92.39     | 21.01    | 12       | 0.9376                      | 12                                                      | 0.9376                                                                   |
|          | Tanintharyi | Kawthaung   | 98.77     | 10.99    | 51       | 53.9523                     | 30                                                      | 27.7112                                                                  |
| Thailand | Nan         | Wang Pha    | 100.75    | 19.13    | 13       | 2.3469                      | 13                                                      | 2.3469                                                                   |
|          | Ranong      | Ranong      | 98.61     | 9.86     | 19       | 188.6042                    | 10                                                      | 5.4404                                                                   |
|          | Sisaket     | Kantharalak | 104.67    | 14.57    | 1        | NA                          | NA                                                      | NA                                                                       |
|          |             | Khukhan     | 104.19    | 14.73    | 1        | NA                          | NA                                                      | NA                                                                       |
|          |             | Khun Han    | 104.41    | 14.54    | 9        | 494.3826                    | 4                                                       | 54.5449                                                                  |
|          |             | Phu Sing    | 104.15    | 14.49    | 17       | 66.3505                     | 13                                                      | 56.0306                                                                  |
|          | Tak         | Maeramat    | 98.59     | 17.10    | 3        | 55.4732                     | NA                                                      | NA                                                                       |
|          |             | Maesot      | 98.73     | 16.74    | 2        | NA                          | NA                                                      | NA                                                                       |
| Phopphra |             | 98.83       | 16.47     | 20       | 34.6918  | 13                          | 11.2540                                                 |                                                                          |
| Vietnam  | BinhPhuoc   | Budang      | 107.22    | 11.78    | 2        | NA                          | NA                                                      | NA                                                                       |
|          |             | Bu Gia Map  | 106.99    | 11.91    | 246      | 35.0462                     | 133                                                     | 4.9697                                                                   |
|          | Soc Trang   | Chauthanh   | 105.90    | 9.68     | 1        | NA                          | NA                                                      | NA                                                                       |
|          | BinhPhuoc   | Phurieng    | 106.94    | 11.69    | 1        | NA                          | NA                                                      | NA                                                                       |

**Supplementary Table 2. Average IBD estimates within and between districts by country.**

|                                                 | Countries         | >2cM            | 2cM - 15cM    | 15cM - 30cM   | > 30cM          |
|-------------------------------------------------|-------------------|-----------------|---------------|---------------|-----------------|
| <b>Within-District Sharing<br/>(Mean ± SD)</b>  | <b>China</b>      | 11.580 ± 13.797 | 0.985 ± 1.054 | 5.022 ± 6.469 | 5.573 ± 6.450   |
|                                                 | <b>Bangladesh</b> | 1.763 ± 0.832   | 0.450 ± 0.467 | 0.674 ± 0.457 | 0.639 ± 0.092   |
|                                                 | <b>Myanmar</b>    | 13.376 ± 11.526 | 1.348 ± 1.255 | 4.338 ± 3.787 | 7.690 ± 6.491   |
|                                                 | <b>Thailand</b>   | 25.923 ± 27.001 | 0.532 ± 0.711 | 1.507 ± 1.475 | 23.884 ± 28.767 |
|                                                 | <b>Cambodia</b>   | 16.972 ± 12.317 | 0.987 ± 0.986 | 3.302 ± 3.478 | 12.684 ± 9.563  |
|                                                 | <b>Vietnam</b>    | 4.970 ± NA      | 0.360 ± NA    | 1.525 ± NA    | 3.084 ± NA      |
|                                                 | <b>Laos</b>       | 8.199 ± 2.537   | 0.581 ± 0.005 | 2.343 ± 0.197 | 5.275 ± 2.335   |
| <b>Between-District<br/>Sharing (Mean ± SD)</b> | <b>China</b>      | 1.636 ± 2.406   | 0.190 ± 0.192 | 0.556 ± 0.652 | 0.890 ± 1.593   |
|                                                 | <b>Bangladesh</b> | 0.589 ± NA      | 0.231 ± NA    | 0.258 ± NA    | 0.099 ± NA      |
|                                                 | <b>Myanmar</b>    | 0.589 ± 0.740   | 0.084 ± 0.097 | 0.223 ± 0.236 | 0.282 ± 0.417   |
|                                                 | <b>Thailand</b>   | 8.339 ± 17.388  | 0.104 ± 0.291 | 0.293 ± 0.703 | 7.941 ± 17.505  |
|                                                 | <b>Cambodia</b>   | 3.682 ± 5.322   | 0.208 ± 0.368 | 0.678 ± 1.308 | 2.796 ± 3.992   |
|                                                 | <b>Vietnam</b>    | ---             | ---           | ---           | ---             |
|                                                 | <b>Laos</b>       | 0.046 ± NA      | 0.015 ± NA    | 0.032 ± NA    | 0.000 ± NA      |

Average IBD sharing within and between districts for each country shown in Figure 2

**Supplementary Table 3. Directional migration inferred between non-admixed and admixed samples across districts**

| District 1 (D1) | District 2 (D2) | p-value           | Average IBD Sharing (cM) (D1N_D2N) | Average IBD Sharing (cM) (D1N_D2A) | Average IBD Sharing (cM) (D2N_D1A) |
|-----------------|-----------------|-------------------|------------------------------------|------------------------------------|------------------------------------|
| Anlong Veng     | Kulen           | <10 <sup>-5</sup> | 0.0000                             | 3.2608                             | 0.0000                             |
| Anlong Veng     | Sala Krau       | <10 <sup>-5</sup> | 0.0000                             | 3.6155                             | 0.0000                             |
| Bago            | Ranong          | <10 <sup>-5</sup> | 0.0000                             | 1.7825                             | 0.0000                             |
| Kampong Sila    | Kravanh         | <10 <sup>-5</sup> | 0.0000                             | 1.5613                             | 0.0000                             |
| Kampong Sila    | Phnom Sruoch    | <10 <sup>-5</sup> | 0.0000                             | 18.0133                            | 0.0000                             |
| Kawthaung       | Ranong          | <10 <sup>-5</sup> | 0.0000                             | 11.0543                            | 0.0000                             |
| Kravanh         | Phnom Sruoch    | <10 <sup>-5</sup> | 0.0000                             | 1.4144                             | 0.0000                             |
| Kravanh         | Sala Krau       | <10 <sup>-5</sup> | 0.0000                             | 11.6627                            | 0.0000                             |
| Pailin          | Sala Krau       | <10 <sup>-5</sup> | 0.0000                             | 2.2660                             | 0.0000                             |
| Pailin          | Veal Veng       | <10 <sup>-5</sup> | 0.0000                             | 1.9976                             | 0.0000                             |
| Phnom Sruoch    | Samlout         | <10 <sup>-5</sup> | 0.0000                             | 0.0000                             | 0.9519                             |
| Rovieng         | Thbeng Meanchey | <10 <sup>-5</sup> | 0.0000                             | 0.0000                             | 14.1607                            |
| Sala Krau       | Samlout         | <10 <sup>-5</sup> | 0.0000                             | 0.0000                             | 3.7770                             |
| Samlout         | Sampov Meas     | <10 <sup>-5</sup> | 3.0278                             | 5.2322                             | 0.0000                             |
| Samlout         | Veal Veng       | <10 <sup>-5</sup> | 0.0000                             | 2.0601                             | 0.0000                             |
| Sampov Meas     | Veal Veng       | <10 <sup>-5</sup> | 0.0000                             | 3.5111                             | 0.0000                             |

Table denotes the average IBD sharing between non-admixed and admixed samples across districts. D1N, D2N, D1A, and D2A represent non-admixed and admixed isolates from district D1 and D2, respectively. All p-values were computed using a permutation test of 100,000 permutations.

## Supplementary References

- 1 Chang, C. C. *et al.* Second-generation PLINK: rising to the challenge of larger and richer datasets. *Gigascience* **4**, 7 (2015).
- 2 Purcell, S. *et al.* PLINK: a tool set for whole-genome association and population-based linkage analyses. *Am J Hum Genet* **81**, 559-575 (2007).
- 3 Alexander, D. H., Novembre, J. & Lange, K. Fast model-based estimation of ancestry in unrelated individuals. *Genome Res* **19**, 1655-1664 (2009).
- 4 Alexander, D. H. & Lange, K. Enhancements to the ADMIXTURE algorithm for individual ancestry estimation. *BMC Bioinformatics* **12**, 246 (2011).
- 5 Manichaikul, A. *et al.* Robust relationship inference in genome-wide association studies. *Bioinformatics* **26**, 2867-2873 (2010).
